# Supplementary material for: Extending the CW3E Atmospheric River Scale to the Polar Regions
Source: Copernicus journal article supplement (doi:10.5194/egusphere-2024-254), 2024-02-20
Supplement: Supplementary file 1 [file egusphere-2024-254-supplement.pdf]

## Supplement

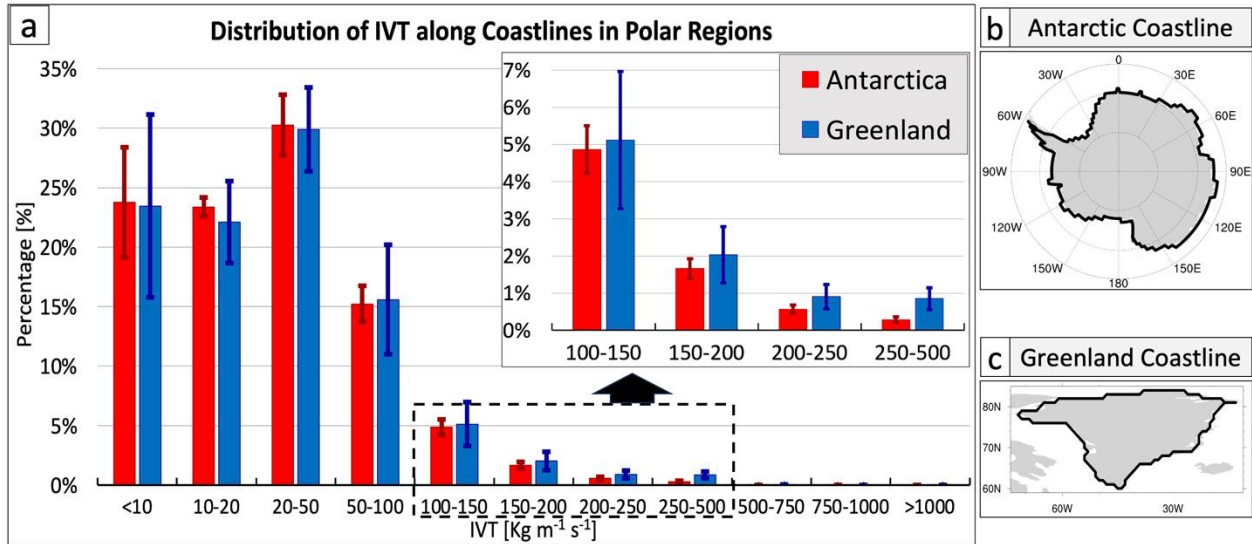

Figure S1. Same as Figure 4 but the Greenland coastline includes the southern part outside of the polar circle (latitude > 67°N).

5

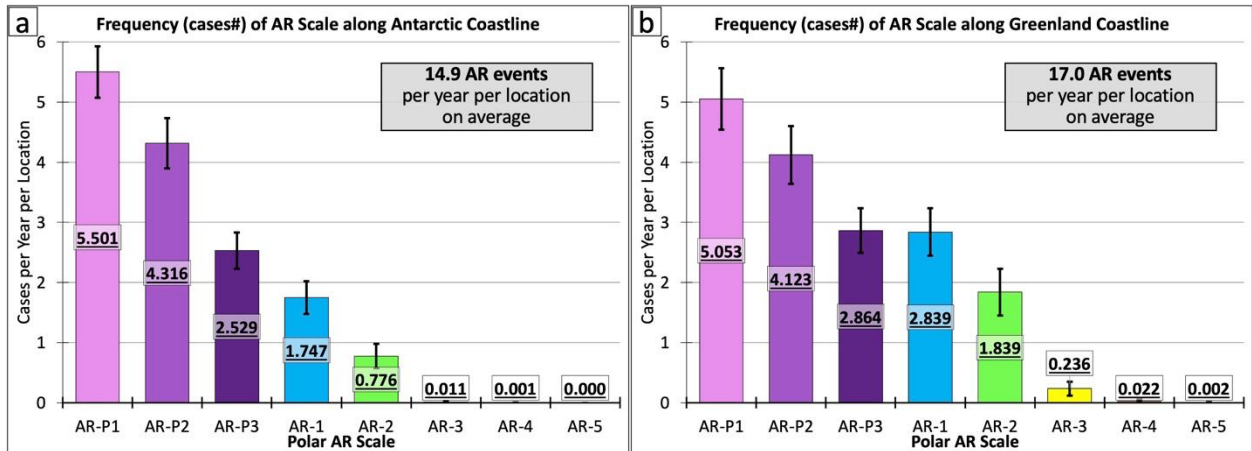

Figure S2. Same as Figure 9 but the Greenland coastline includes the southern part outside of the polar circle (latitude > 67°N).

10
